# Supplementary material for: NLRP3 Localizes to the Tubular Epithelium in Human Kidney and Correlates With Outcome in IgA Nephropathy
Source: PubMed Central journal article supplement (PMC4837396; doi:10.1038/srep24667), 2016-04-20
Supplement: srep24667-s1.pdf [file srep24667-s1.pdf]

**NLRP3 Localizes to the Tubular Epithelium in Human Kidney and Correlates  
With Outcome in IgA Nephropathy**

Justin Chun<sup>\*</sup>, Hyunjae Chung<sup>\*</sup>, Xiangyu Wang<sup>\*</sup>, Rebecca Barry<sup>\*</sup>, Zohreh Mohammad Taheri<sup>‡</sup>, Jaye M. Platnich<sup>\*</sup>, Sofia B. Ahmed<sup>\*</sup>, Kiril Trpkov<sup>‡</sup>, Brenda Hemmelgarn<sup>\*</sup>, Hallgrimur Benediktsson<sup>‡</sup>, Matthew James<sup>\*</sup>, and Daniel A Muruve<sup>\*,||</sup>

<sup>\*</sup>Department of Medicine, <sup>‡</sup>Department of Pathology and Laboratory Medicine, Snyder Institute for Chronic Diseases, University of Calgary, Calgary, Alberta, Canada.

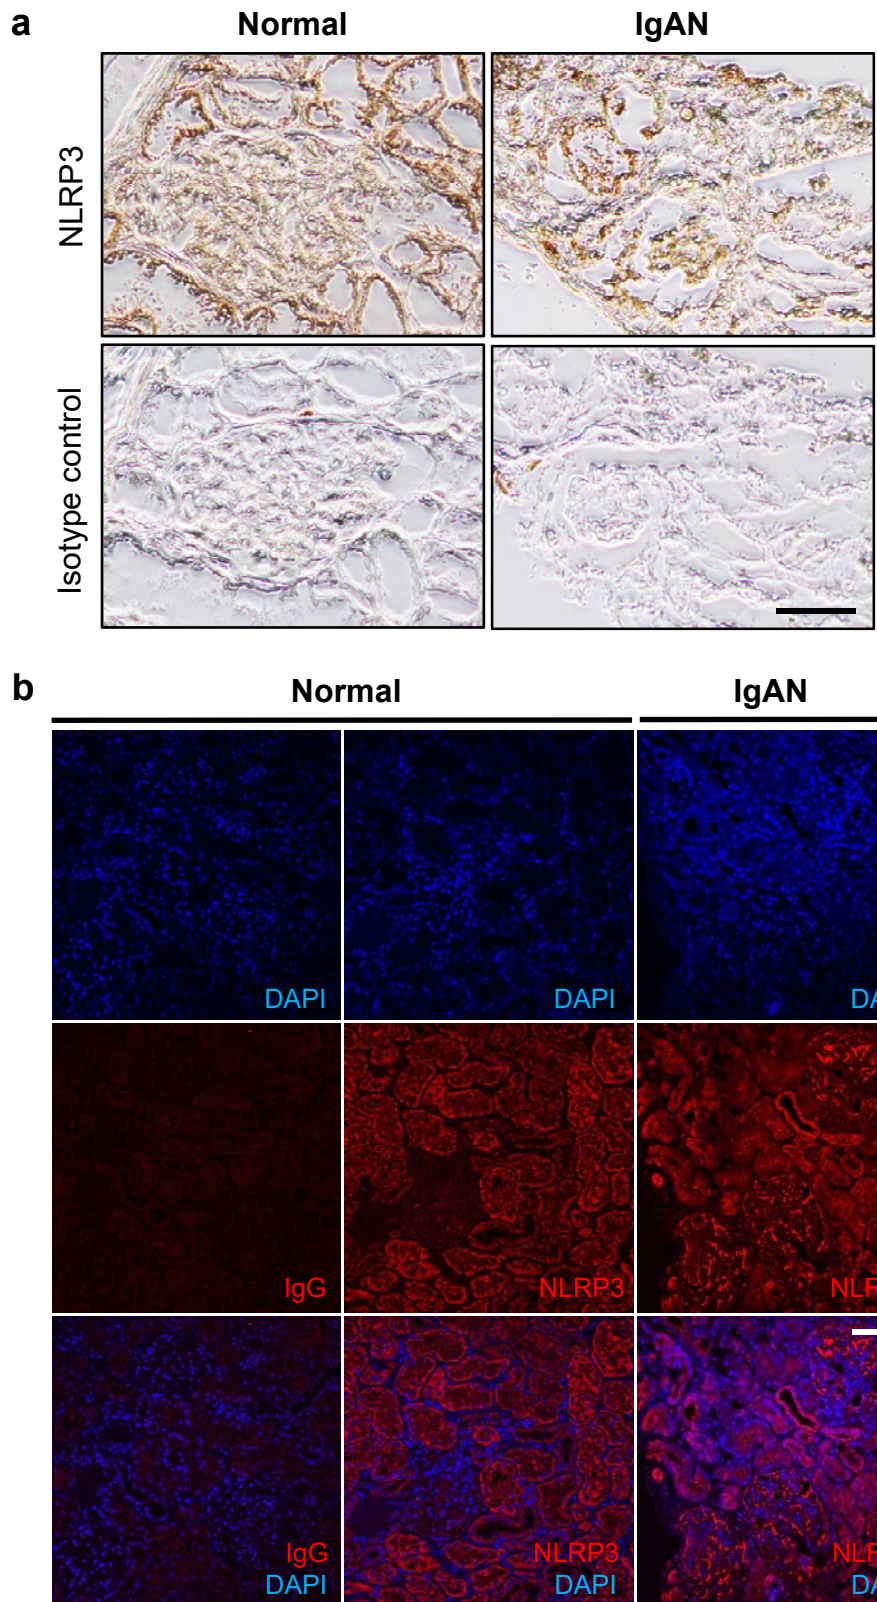

**Supplementary Figure S1. Mouse IgG isotype control and NLRP3 expression in human kidney tissue.** (a) Sections of frozen tissue from representative nephrectomy sample with normal margins or biopsy from a patient with IgAN were immunoperoxidase stained with mouse monoclonal NLRP3 (Cryo2) or mouse IgG isotype control antibodies without counterstaining with hematoxylin. Scale bar represents 100  $\mu$ m. (b) Indirect immunofluorescence for NLRP3 (Cryo2; red) or mouse IgG (red) with DAPI (blue) in paraffin embedded tissue from a nephrectomy with normal margins or a biopsy from a representative patient with IgAN. Scale bar represents 100  $\mu$ m.
